# Supplementary material
Source: PubMed Central journal article supplement (PMC7025816)
Supplement: NIHMS1011232-supplement-Supplelmentary_material_-_questionnaire.pdf [file NIHMS1011232-supplement-Supplelmentary_material_-_questionnaire.pdf]

Question 1: If you were to go back in time, would you have done the surgery again?

If not, why not?

Question 2: How satisfied were you with the outcome of your surgery?

- 1 – Not at all satisfied
- 2 – Slightly satisfied
- 3 – Moderately satisfied
- 4 – Very satisfied
- 5 – Extremely satisfied

Question 3: In your mind, did the surgery lead to a positive change in your life?

If not, why not?

Question 4: The next set of question is about urination. Please answer yes or no.

- a. Before surgery were you able to stand to pee?
- b. After your initial recovery from surgery were you able to stand to pee?
- c. Currently are you able to stand to pee?

Question 5: The next set of questions is about genital hygiene. Please answer: none, some, a lot.

- a. Before surgery, how much difficulty did you have with genital hygiene?
- b. After your initial recovery from surgery, how much difficulty did you have with genital hygiene?
- c. Currently, how much difficulty do you have with genital hygiene?

Question 6: The next set of questions is about being able to see your penis. Please answer yes or no.

- a. Before surgery were you able to see your penis?
- b. After your initial recovery from surgery were you able to see your penis?
- c. Currently are you able to see your penis?

Question 7: The next set of questions is about erections. Please answer yes or no.

- a. Before surgery were you able to get erections?
- b. After your initial recovery from surgery were you able to get erections?
- c. Currently are you able to get erections?

Question 8: The next set of questions is about being sexually active. Please answer yes or no.

- a. Before surgery were you sexually active?
- b. After your initial recovery from surgery were you sexually active?
- c. Currently are you sexually active?

Question 9: In your mind, has the surgery remained a success?

Question 10: Have you had to have any repeat surgeries for buried penis since the initial surgery?
